# Supplementary material for: Association between all aspects of dietary diversity and risk of depressive symptoms in US adults
Source: Royal Society of Chemistry journal article supplement (doi:10.1039/d3fo00642e), 2023-01-01
Supplement: d3fo00642e2.pdf [file d3fo00642e2.pdf]

### Supplementary Materials

**Table S1. Definition of five groups in the analysis of Dietary Diversity Score.**

| Food Group | Definition                                                                                                                                                      |
|------------|-----------------------------------------------------------------------------------------------------------------------------------------------------------------|
| Dairy      | all milk and milk products, with a minimum amount of 15g for solids and 30g for liquids and mixed dishes.                                                       |
| Meat       | all sources of animal and plant protein, with a minimum amount of 30g for solids and 60g for liquids and mixed dishes.                                          |
| Grain      | all grain products except cakes, pies, cookies, and pastries, with a minimum amount of 15g for solids and 30g for liquids and mixed dishes.                     |
| Fruit      | all fresh, canned, frozen, and dried fruits or fruit juices, except fruit drinks, with a minimum amount of 30g for solids and 60g for liquids and mixed dishes. |
| Vegetable  | all raw, cooked frozen, canned vegetables, with a minimum amount of 30g for solids and 60g for liquids and mixed dishes.                                        |

**Table S2. Food attributes based on USDA Food Patterns Equivalents Database**

| Attributes                                                        | Code        | Definition                                                                                                                                                                                               |
|-------------------------------------------------------------------|-------------|----------------------------------------------------------------------------------------------------------------------------------------------------------------------------------------------------------|
| <b>Animal-source protein</b>                                      | 1:Yes; 0:No | Protein Foods, Meat<br>Protein Foods, Poultry<br>Protein Foods, Seafood High in EPA/DHA<br>Protein Foods, Seafood Low in EPA/DHA<br>Protein Foods, Eggs<br>Dairy, Milk<br>Dairy, Yogurt<br>Dairy, Cheese |
| <b>Plant-source protein</b>                                       | 1:Yes; 0:No | Soy Products<br>Nuts and Seeds                                                                                                                                                                           |
| <b>Whole grains</b>                                               | 1:Yes; 0:No | Whole Grains                                                                                                                                                                                             |
| <b>Refined grains</b>                                             | 1:Yes; 0:No | Refined Grains                                                                                                                                                                                           |
| <b>Fiber</b>                                                      | 1:Yes; 0:No | Total fruit, vegetables, and grains                                                                                                                                                                      |
| <b>Sodium</b>                                                     | 1:Yes; 0:No | Having sodium or not.                                                                                                                                                                                    |
| <b>Alcohol</b>                                                    | 1:Yes; 0:No | Having alcohol or not.                                                                                                                                                                                   |
| <b>Eicosapentaenoic acid (EPA)<br/>Docosahexaenoic acid (DHA)</b> | 1:Yes; 0:No | Having EPA, DHA or not.                                                                                                                                                                                  |
| <b>Oils</b>                                                       | 1:Yes; 0:No | Oils                                                                                                                                                                                                     |
| <b>Solid fats</b>                                                 | 1:Yes; 0:No | Solid fats                                                                                                                                                                                               |

**Table S3. Weighted ORs and 95% CIs for depressive symptoms according to quintiles of DDS, HFDI, and HEI over the age of 60y.**

|             | Cutoff(pmol/g)     | Crude             | Model 1 <sup>a</sup> | Model 2 <sup>b</sup> |
|-------------|--------------------|-------------------|----------------------|----------------------|
|             |                    | OR (95% CI)       | OR (95% CI)          | OR (95% CI)          |
| <b>DDS</b>  |                    |                   |                      |                      |
| DDS≤1.5     | -                  | Ref.              | Ref.                 | Ref.                 |
| DDS=2       | -                  | 0.64(0.14, 2.91)  | 0.63(0.14, 2.95)     | 1.42(0.13, 15.67)    |
| DDS=2.5     | -                  | 0.28(0.08, 0.96)* | 0.28(0.08, 0.95)*    | 0.34(0.03, 3.91)     |
| DDS=3       | -                  | 0.32(0.09, 1.18)  | 0.32(0.09, 1.18)     | 0.48(0.04, 6.09)     |
| DDS=3.5     | -                  | 0.50(0.14, 1.77)  | 0.49(0.14, 1.76)     | 0.98(0.08, 12.12)    |
| DDS=4       | -                  | 0.36(0.10, 1.23)  | 0.35(0.10, 1.23)     | 0.71(0.08, 6.49)     |
| DDS=4.5     | -                  | 0.19(0.06, 0.63)* | 0.19(0.05, 0.64)*    | 0.32(0.03, 3.89)     |
| DDS=5       | -                  | 0.18(0.06, 0.56)* | 0.18(0.06, 0.56)*    | 0.24(0.02, 2.99)     |
| <b>HFDI</b> |                    |                   |                      |                      |
| Q1          | <0.135             | Ref.              | Ref.                 | Ref.                 |
| Q2          | 0.135 to <0.244    | 0.73(0.35, 1.51)  | 0.75(0.36, 1.54)     | 0.58(0.18, 1.84)     |
| Q3          | 0.244 to <0.331    | 0.58(0.26, 1.29)  | 0.59(0.26, 1.34)     | 0.24(0.06, 0.98)*    |
| Q4          | 0.331 to <0.430    | 0.31(0.14, 0.73)* | 0.32(0.14, 0.75)*    | 0.19(0.05, 0.69)*    |
| Q5          | ≥0.430             | 0.35(0.16, 0.73)* | 0.36(0.17, 0.77)*    | 0.23(0.07, 0.73)*    |
| <b>HEI</b>  |                    |                   |                      |                      |
| Q1          | < 43.821           | Ref.              | Ref.                 | Ref.                 |
| Q2          | 43.821 to <52.060  | 1.22(0.64, 2.33)  | 1.21(0.64, 2.31)     | 1.99(0.78, 5.06)     |
| Q3          | 52.060 to <59.415  | 0.48(0.27, 0.84)* | 0.46(0.26, 0.82)*    | 0.63(0.25, 1.61)     |
| Q4          | 59.415 to < 68.094 | 0.62(0.35, 1.10)  | 0.59(0.34, 1.05)     | 0.72(0.24, 2.16)     |
| Q5          | ≥68.094            | 0.55(0.29, 1.06)  | 0.53(0.27, 1.04)     | 0.79(0.29, 2.15)     |

DDS, Dietary diversity score. HFDI, Healthy Food Diversity index. HEI, Healthy Eating Index. and JD, a: model 1 was adjusted by age, and sex; b: Model 2 further adjusted race, educational status, household income, marital status, BMI, energy intake, smoking status, alcohol use, antidepressant use, hypertension, and diabetes; \*:  $P<0.05$  \*\*:  $P<0.01$ ; OR, odds ratio; CI, confidence interval;

**Table S4. Weighted ORs and 95% CIs for depressive symptoms according to quintiles of DDS, HFDI, and HEI in females.**

|             | Cutoff(pmol/g)     | Crude              | Model 1 <sup>a</sup> | Model 2 <sup>b</sup> |
|-------------|--------------------|--------------------|----------------------|----------------------|
|             |                    | OR (95% CI)        | OR (95% CI)          | OR (95% CI)          |
| <b>DDS</b>  |                    |                    |                      |                      |
| DDS≤1.5     | -                  | Ref.               | Ref.                 | Ref.                 |
| DDS=2       | -                  | 0.86(0.50, 1.47)   | 0.86(0.51, 1.47)     | 0.79(0.29, 2.18)     |
| DDS=2.5     | -                  | 0.68(0.40, 1.16)   | 0.68(0.40, 1.17)     | 0.58(0.23, 1.45)     |
| DDS=3       | -                  | 0.67(0.40, 1.14)   | 0.68(0.40, 1.15)     | 0.61(0.25, 1.49)     |
| DDS=3.5     | -                  | 0.55(0.33, 0.93)*  | 0.56(0.32, 0.95)*    | 0.52(0.20, 1.34)     |
| DDS=4       | -                  | 0.63(0.36, 1.10)   | 0.63(0.35, 1.13)     | 0.42(0.16, 1.08)     |
| DDS=4.5     | -                  | 0.27(0.16, 0.47)** | 0.28(0.16, 0.49)**   | 0.25(0.09, 0.71)*    |
| DDS=5       | -                  | 0.25(0.11, 0.58)*  | 0.26(0.11, 0.61)*    | 0.34(0.08, 1.51)     |
| <b>HFDI</b> |                    |                    |                      |                      |
| Q1          | <0.126             | Ref.               | Ref.                 | Ref.                 |
| Q2          | 0.126 to <0.234    | 0.64(0.43, 0.95)*  | 0.65(0.43, 0.97)*    | 0.56(0.32, 0.98)*    |
| Q3          | 0.234 to <0.328    | 0.82(0.55, 1.22)   | 0.83(0.56, 1.24)     | 0.39(0.22, 0.69)*    |
| Q4          | 0.328to <0.439     | 0.62(0.40, 0.97)*  | 0.63(0.40, 0.99)*    | 0.47(0.23, 0.95)*    |
| Q5          | ≥0.439             | 0.49(0.31, 0.78)*  | 0.49(0.31, 0.78)*    | 0.55(0.28, 1.09)     |
| <b>HEI</b>  |                    |                    |                      |                      |
| Q1          | <41.614            | Ref.               | Ref.                 | Ref.                 |
| Q2          | 41.614 to <49.567  | 0.86(0.58, 1.27)   | 0.86(0.58, 1.28)     | 0.59(0.36, 0.98)*    |
| Q3          | 49.567 to <57.320  | 0.54(0.37, 0.80)*  | 0.55(0.37, 0.81)*    | 0.52(0.27, 0.99)*    |
| Q4          | 57.320 to < 66.358 | 0.46(0.30, 0.68)** | 0.46(0.31, 0.69)**   | 0.45(0.26, 0.81)*    |
| Q5          | ≥66.358            | 0.48(0.35, 0.66)** | 0.49(0.36, 0.67)**   | 0.34(0.18, 0.65)*    |

DDS, Dietary diversity score. HFDI, Healthy Food Diversity index. HEI, Healthy Eating Index. and JD, a: model 1 was adjusted by age, and sex; b: Model 2 further adjusted race, educational status, household income, marital status, BMI, energy intake, smoking status, alcohol use, antidepressant use, hypertension, and diabetes, hysterectomy, ovaries removed, and usage of female hormones; \*:  $P<0.05$  \*\*:  $P<0.01$ ; OR, odds ratio; CI, confidence interval;

**Table S5. Weighted ORs and 95% CIs for depressive symptoms according to quintiles of DDS, HFDI, and HEI, in males.**

|             | Cutoff(pmol/g)     | Crude              | Model 1 <sup>a</sup> | Model 2 <sup>b</sup> |
|-------------|--------------------|--------------------|----------------------|----------------------|
|             |                    | OR (95% CI)        | OR (95% CI)          | OR (95% CI)          |
| <b>DDS</b>  |                    |                    |                      |                      |
| DDS≤1.5     | -                  | Ref.               | Ref.                 | Ref.                 |
| DDS=2       | -                  | 0.76(0.38, 1.52)   | 0.77(0.39, 1.55)     | 0.59(0.19, 1.83)     |
| DDS=2.5     | -                  | 0.34(0.15, 0.77)*  | 0.34(0.15, 0.76)*    | 0.47(0.14, 1.60)     |
| DDS=3       | -                  | 0.48(0.23, 1.00)   | 0.47(0.23, 0.97)*    | 0.54(0.15, 1.90)     |
| DDS=3.5     | -                  | 0.45(0.20, 0.99)*  | 0.42(0.19, 0.93)*    | 0.37(0.10, 1.39)     |
| DDS=4       | -                  | 0.29(0.12, 0.70)*  | 0.27(0.11, 0.66)*    | 0.47(0.14, 1.62)     |
| DDS=4.5     | -                  | 0.18(0.08, 0.40)** | 0.16(0.07, 0.37)**   | 0.20(0.05, 0.81)*    |
| DDS=5       | -                  | 0.16(0.05, 0.49)*  | 0.14(0.05, 0.43)*    | 0.09(0.02, 0.35)*    |
| <b>HFDI</b> |                    |                    |                      |                      |
| Q1          | <0.130             | Ref.               | Ref.                 | Ref.                 |
| Q2          | 0.130 to <0.238    | 0.57(0.28, 1.19)   | 0.57(0.28, 1.18)     | 0.40(0.19, 0.86)*    |
| Q3          | 0.238 to <0.333    | 0.65(0.36, 1.19)   | 0.65(0.35, 1.19)     | 0.43(0.19, 0.99)*    |
| Q4          | 0.333 to <0.440    | 0.63(0.36, 1.12)   | 0.63(0.35, 1.19)     | 0.75(0.35, 1.59)     |
| Q5          | ≥0.440             | 0.49(0.29, 0.82)*  | 0.48(0.29, 0.81)*    | 0.49(0.24, 1.04)     |
| <b>HEI</b>  |                    |                    |                      |                      |
| Q1          | <39.688            | Ref.               | Ref.                 | Ref.                 |
| Q2          | 39.688 to <47.450  | 1.04(0.68, 1.57)   | 1.01(0.68, 1.51)     | 0.84(0.45, 4.58)     |
| Q3          | 47.450 to <54.700  | 0.77(0.57, 1.03)   | 0.75(0.56, 0.99)*    | 0.79(0.45, 1.40)     |
| Q4          | 54.700 to < 63.580 | 0.40(0.24, 0.65)*  | 0.38(0.24, 0.62)*    | 0.47(0.22, 1.01)     |
| Q5          | ≥ 63.580           | 0.42(0.22, 0.80)*  | 0.40(0.21, 0.75)*    | 0.37(0.12, 1.08)     |

DDS, Dietary diversity score. HFDI, Healthy Food Diversity index. HEI, Healthy Eating Index. and JD, a: model 1 was adjusted by age, and sex; b: Model 2 further adjusted race, educational status, household income, marital status, BMI, energy intake, smoking status, alcohol use, antidepressant use, hypertension, and diabetes; \*:  $P<0.05$  \*\*:  $P<0.01$ ; OR, odds ratio; CI, confidence interval;

**Table S6. Weighted ORs and 95% CIs for depressive symptoms according to quintiles of DDS, HFDI, and HEI in the age of 18y to 39y.**

| Cutoff(pmol/g) | Crude              | Model 1 <sup>a</sup> | Model 2 <sup>b</sup> |
|----------------|--------------------|----------------------|----------------------|
|                | OR (95% CI)        | OR (95% CI)          | OR (95% CI)          |
| <b>DDS</b>     |                    |                      |                      |
| DDS≤1.5        | -                  | Ref.                 | Ref.                 |
| DDS=2          | -                  | 1.05(0.55, 2.01)     | 1.09(0.57, 2.08)     |
| DDS=2.5        | -                  | 0.90(0.47, 1.73)     | 0.91(0.48, 1.71)     |
| DDS=3          | -                  | 0.84(0.40, 1.74)     | 0.81(0.40, 1.64)     |
| DDS=3.5        | -                  | 0.87(0.43, 1.76)     | 0.83(0.42, 1.65)     |
| DDS=4          | -                  | 0.82(0.41, 1.65)     | 0.79(0.40, 1.54)     |
| DDS=4.5        | -                  | 0.33(0.16, 0.65)*    | 0.31(0.16, 0.61)*    |
| DDS=5          | -                  | 0.22(0.05, 1.01)     | 0.21(0.05, 0.96)*    |
| <b>HFDI</b>    |                    |                      |                      |
| Q1             | <0.126             | Ref.                 | Ref.                 |
| Q2             | 0.126 to <0.236    | 0.54(0.31, 0.96)*    | 0.56(0.32, 1.00)*    |
| Q3             | 0.236 to <0.338    | 1.25(0.66, 2.37)     | 1.32(0.71, 2.45)     |
| Q4             | 0.338to <0.460     | 1.04(0.59, 1.84)     | 1.09(0.61, 1.94)     |
| Q5             | ≥0.460             | 0.60(0.33, 1.10)     | 0.62(0.34, 1.15)     |
| <b>HEI</b>     |                    |                      |                      |
| Q1             | <37.652            | Ref.                 | Ref.                 |
| Q2             | 37.652 to <44.966  | 0.97(0.65, 1.43)     | 0.93(0.63, 1.35)     |
| Q3             | 44.966 to <52.008  | 0.70(0.45, 1.09)     | 0.68(0.44, 1.06)     |
| Q4             | 52.008 to < 60.794 | 0.54(0.34, 0.86)*    | 0.51(0.31, 0.81)*    |
| Q5             | ≥60.794            | 0.65(0.39, 1.10)     | 0.58(0.35, 0.98)     |

DDS, Dietary diversity score. HFDI, Healthy Food Diversity index. HEI, Healthy Eating Index. and JD, a: model 1 were adjusted by age, and sex; b: Model 2 further adjusted race, educational status, household income, marital status, BMI, energy intake, smoking status, alcohol use, antidepressant use, hypertension, and diabetes; \*:  $P<0.05$  \*\*:  $P<0.01$ ; OR, odds ratio; CI, confidence interval;

**Table S7. Weighted ORs and 95% CIs for depressive symptoms according to quintiles of DDS, HFDI, HEI, and JD in sensitive analysis.**

| Cutoff(pmol/g) | Crude       | Model 1 <sup>a</sup> | Model 2 <sup>b</sup> |
|----------------|-------------|----------------------|----------------------|
|                | OR (95% CI) | OR (95% CI)          | OR (95% CI)          |
| <b>DDS</b>     |             |                      |                      |
| DDS≤1.5        | -           | Ref.                 | Ref.                 |
| DDS=2          | -           | 0.80(0.52, 1.22)     | 0.83(0.54, 1.27)     |
| DDS=2.5        | -           | 0.52(0.34, 0.78)*    | 0.51(0.34, 0.77)*    |
| DDS=3          | -           | 0.59(0.37, 0.93)*    | 0.56(0.36, 0.90)*    |
| DDS=3.5        | -           | 0.51(0.33, 0.79)*    | 0.48(0.31, 0.74)**   |
| DDS=4          | -           | 0.47(0.29, 0.76)*    | 0.44(0.27, 0.71)**   |
| DDS=4.5        | -           | 0.22(0.15, 0.35)**   | 0.21(0.14, 0.33)**   |
| DDS=5          | -           | 0.21(0.10, 0.45)**   | 0.19(0.09, 0.42)**   |

**Berry-index**

|    |                 |                   |                   |                  |
|----|-----------------|-------------------|-------------------|------------------|
| Q1 | <0.747          | Ref.              | Ref.              | Ref.             |
| Q2 | 0.747 to <0.821 | 0.74(0.55, 1.00)  | 0.74(0.55, 0.99)* | 0.86(0.50, 1.46) |
| Q3 | 0.821 to <0.860 | 0.68(0.49, 0.94)* | 0.68(0.49, 0.93)* | 0.67(0.40, 1.14) |
| Q4 | 0.860 to <0.891 | 0.77(0.53, 1.11)  | 0.77(0.53, 1.10)  | 1.09(0.59, 1.99) |
| Q5 | ≥0.891          | 0.60(0.44, 0.81)* | 0.59(0.44, 0.80)* | 0.72(0.36, 1.41) |

**HFDI**

|    |                 |                    |                    |                   |
|----|-----------------|--------------------|--------------------|-------------------|
| Q1 | <0.128          | Ref.               | Ref.               | Ref.              |
| Q2 | 0.128 to <0.236 | 0.59(0.42, 0.81)*  | 0.61(0.44, 0.86)*  | 0.49(0.26, 0.94)* |
| Q3 | 0.236 to <0.330 | 0.74(0.52, 1.05)   | 0.78(0.56, 1.08)   | 0.38(0.21, 0.69)* |
| Q4 | 0.330 to <0.439 | 0.58(0.41, 0.82)*  | 0.62(0.44, 0.87)*  | 0.50(0.23, 1.06)  |
| Q5 | ≥0.439          | 0.46(0.31, 0.67)** | 0.48(0.33, 0.70)** | 0.37(0.17, 0.83)* |

**HEI**

|    |                   |                    |                    |                   |
|----|-------------------|--------------------|--------------------|-------------------|
| Q1 | <40.640           | Ref.               | Ref.               | Ref.              |
| Q2 | 40.640 to <48.473 | 1.12(0.85, 1.47)   | 1.09(0.82, 1.43)   | 0.99(0.58, 1.73)  |
| Q3 | 48.473 to <56.070 | 0.66(0.49, 0.90)*  | 0.63(0.47, 0.86)*  | 0.70(0.37, 1.32)  |
| Q4 | 56.070 to <65.171 | 0.49(0.36, 0.69)** | 0.46(0.33, 0.64)** | 0.58(0.32, 1.06)  |
| Q5 | ≥65.171           | 0.51(0.36, 0.73)** | 0.46(0.32, 0.65)** | 0.39(0.17, 0.91)* |

**JD**

|    |                 |                   |                  |                   |
|----|-----------------|-------------------|------------------|-------------------|
| Q1 | <0.360          | Ref.              | Ref.             | Ref.              |
| Q2 | 0.360 to <0.389 | 0.80(0.59, 1.07)  | 0.83(0.61, 1.12) | 1.07 (0.63, 1.82) |
| Q3 | 0.389 to <0.410 | 0.88(0.64, 1.21)  | 0.91(0.66, 1.25) | 0.84(0.45, 1.57)  |
| Q4 | 0.410 to <0.433 | 0.70(0.51, 0.97)* | 0.74(0.53, 1.02) | 0.73(0.35, 1.54)  |
| Q5 | ≥0.433          | 0.73(0.53, 1.01)  | 0.78(0.56, 1.09) | 0.96(0.51, 1.83)  |

---

DDS, Dietary diversity score. HFDI, Healthy Food Diversity index. HEI, Healthy Eating Index. and JD, a: model 1 was adjusted by age, and sex; b: Model 2 further adjusted race, educational status, household income, marital status, BMI, energy intake, smoking status, alcohol use, antidepressant use, hypertension, and diabetes; c: Cochran-Armitage test was conducted in DDS analysis. \*:  $P < 0.05$  \*\*:  $P < 0.01$ ; OR, odds ratio; CI, confidence interval;

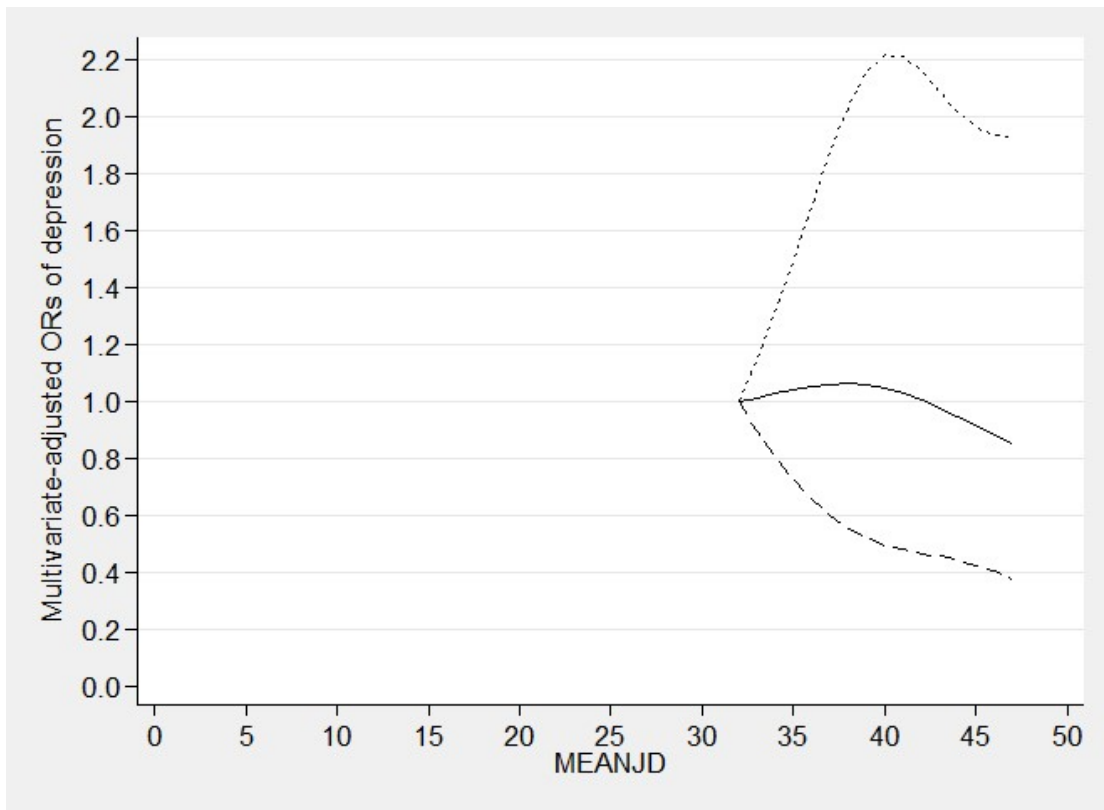

**Figure S1. Dose-response relationships between JD and depressive symptoms.**

The associations were adjusted for age, sex, race, educational status, household income, marital status, BMI, energy intake, smoking status, alcohol use, antidepressant use, hypertension, and diabetes. The solid line and dashed line represent the estimated ORs and its 95% CI. CI, confidence intervals; OR, odds ratio. JD, Jaccard distance. The values were multiplied by 100 to facilitate calculation.
